# Supplementary material
Source: PubMed Central journal article supplement (PMC5858970)

Sample 1: LccTamnew.fsa

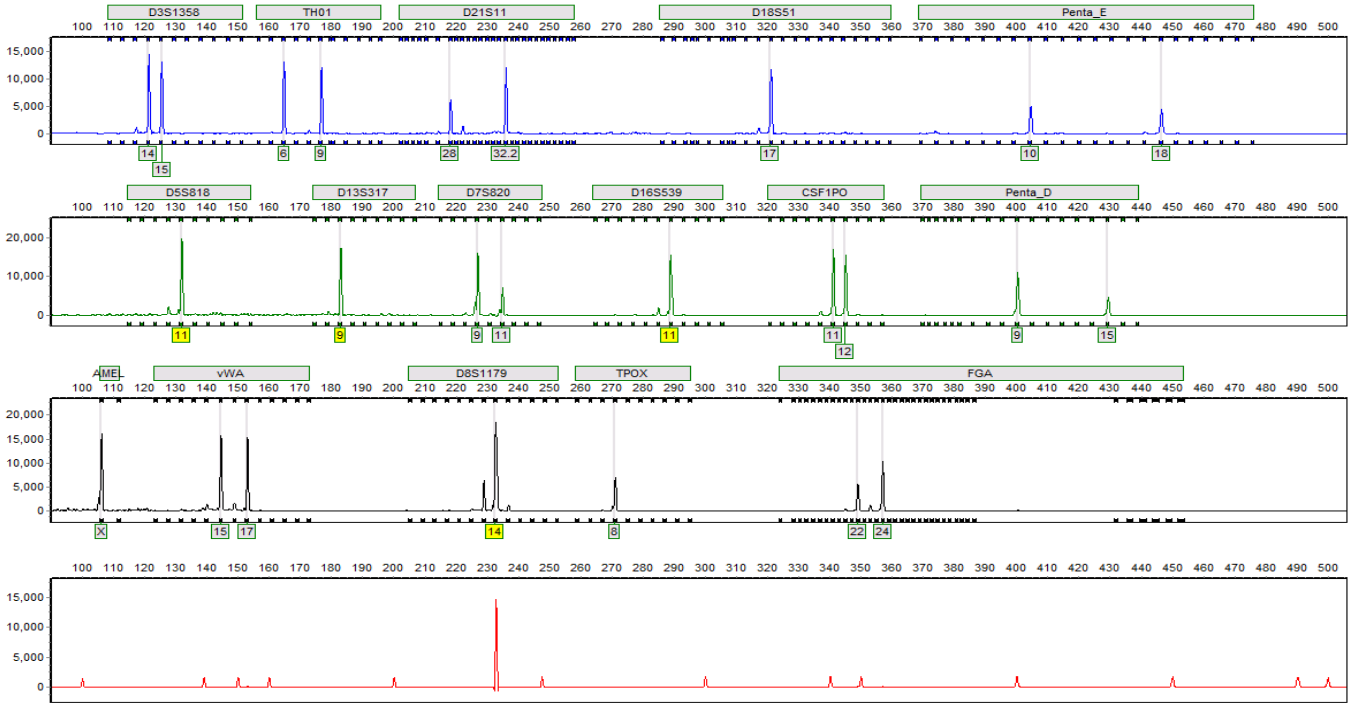

Sample 2: LecTamold.fsa

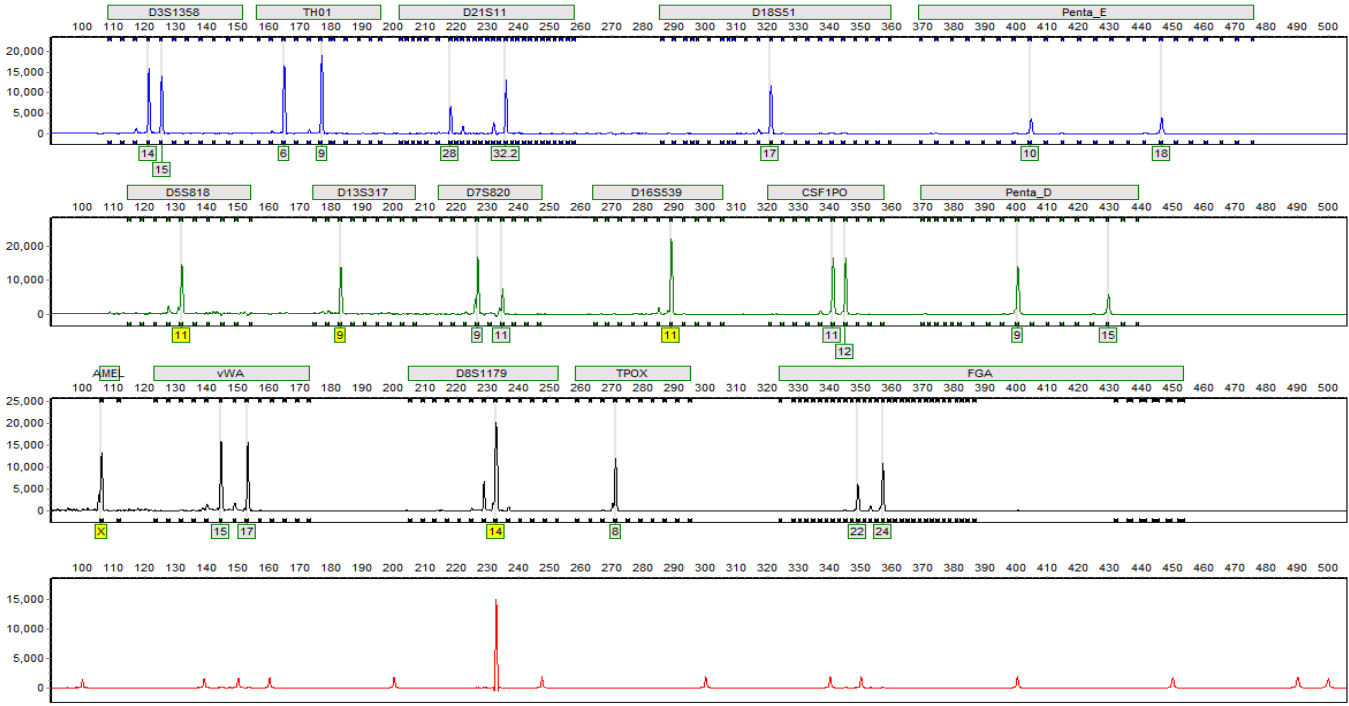

Sample 5: SUM44new.fsa

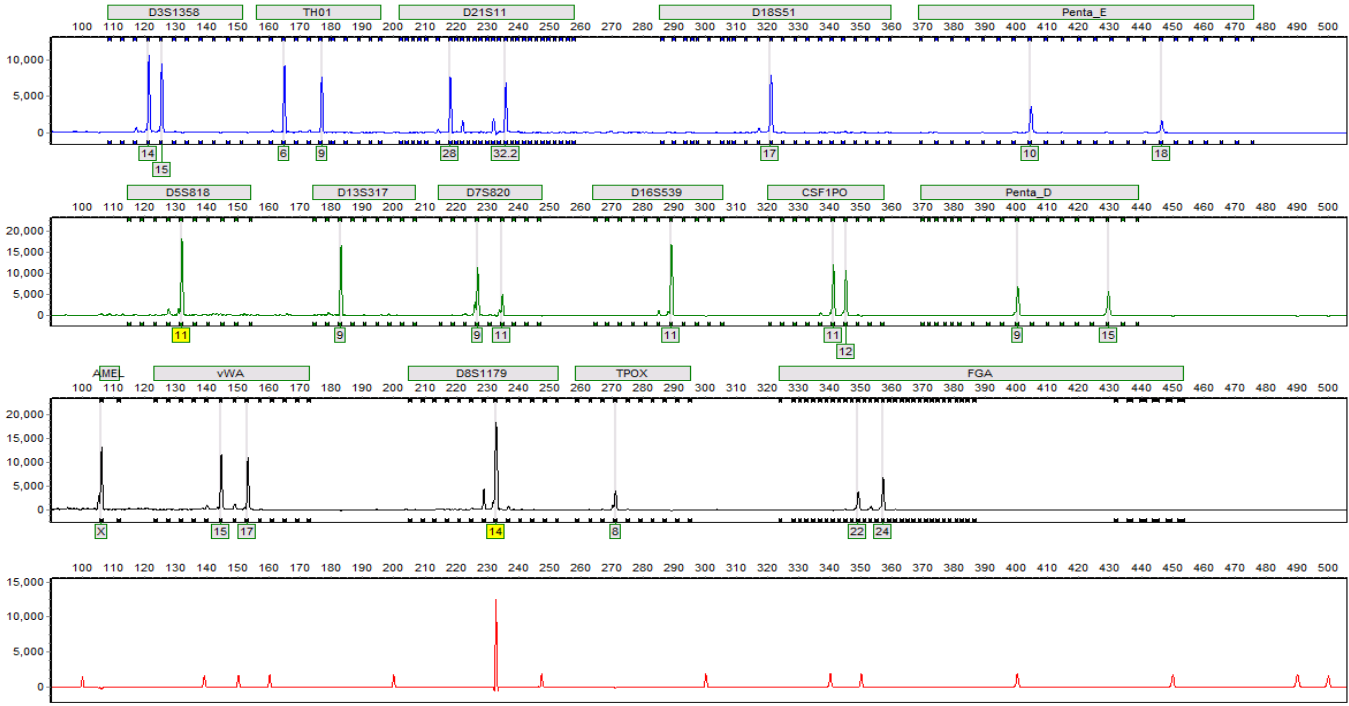

Sample 6: SUM44old.fsa

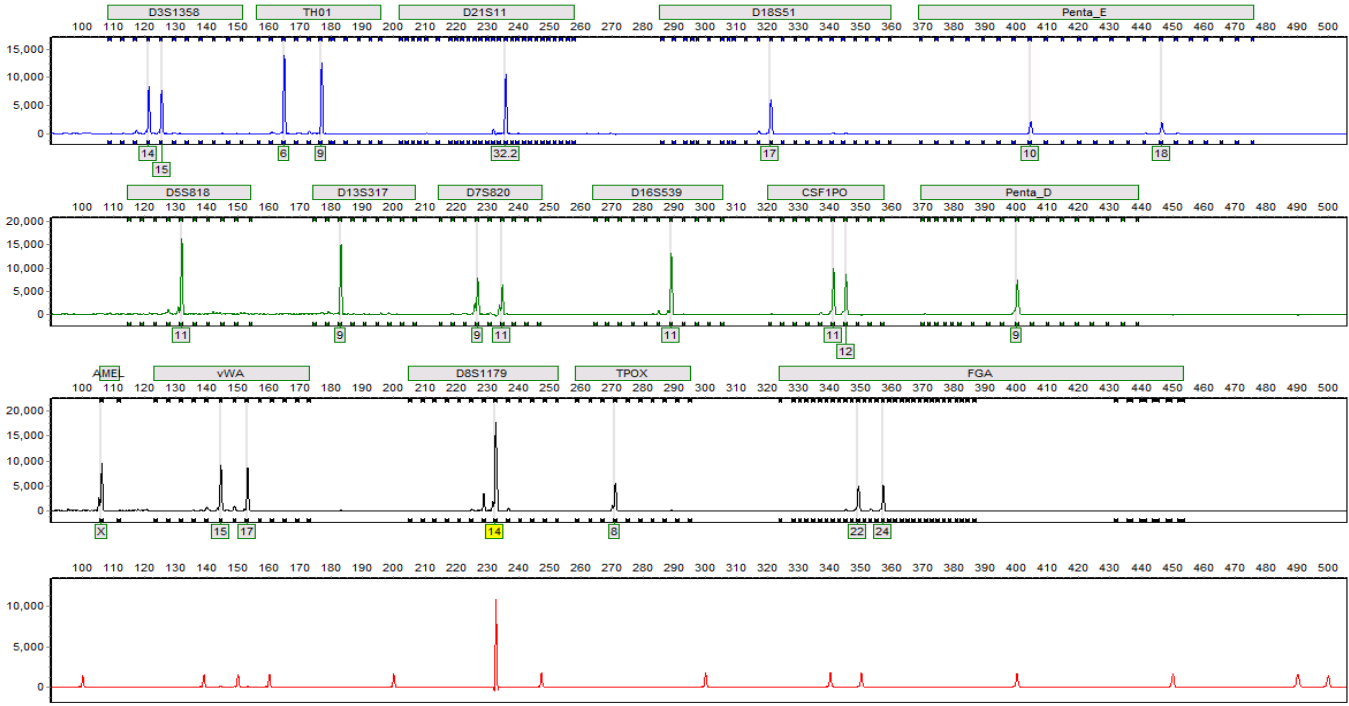

Supplement: NIHMS909796-supplement-4.pdf [file NIHMS909796-supplement-4.pdf]
